1        **Sex-specific T cell exhaustion drives differential immune responses in glioblastoma**

2        Juyeun Lee<sup>1</sup>, Michael Nicosia<sup>2</sup>, Daniel J. Silver<sup>1,3</sup>, Cathy Li<sup>1</sup>, Defne Bayik<sup>1,3</sup>, Dionysios C.  
3        Watson<sup>1,4</sup>, Adam Lauko<sup>1,5</sup>, Sadie Johnson<sup>1</sup>, Mary McGraw<sup>6</sup>, Matthew M. Grabowski<sup>6</sup>, Danielle D.  
4        Kish<sup>2</sup>, Amar Desai<sup>3,7</sup>, Wendy Goodman<sup>7</sup>, Scott J. Cameron<sup>1</sup>, Hideo Okada<sup>8</sup>, Anna Valujskikh<sup>2</sup>,  
5        Robert L. Fairchild<sup>2</sup>, Manmeet S. Ahluwalia<sup>9</sup>, Justin D. Lathia<sup>1,3,6</sup>

6

7        <sup>1</sup>Department of Cardiovascular and Metabolic Sciences, Lerner Research Institute, Cleveland  
8        Clinic, Cleveland, OH

9        <sup>2</sup>Department of Infection and Immunity, Lerner Research Institute, Cleveland Clinic, Cleveland,  
10        OH

11        <sup>3</sup>Case Comprehensive Cancer Center, Cleveland, OH

12        <sup>4</sup>Hematology/Oncology Division, Department of Medicine, University Hospitals Cleveland Medical  
13        Center

14        <sup>5</sup>Medical Scientist Training Program, Department of Medicine, Case Western Reserve University,  
15        Cleveland OH

16        <sup>6</sup>Rose Ella Burkhardt Brain Tumor Center, Cleveland Clinic, Cleveland, OH

17        <sup>7</sup>Department of Medicine, Case Western Reserve University, Cleveland OH

18        <sup>8</sup>Department of Neurological Surgery, University of California San Francisco, San Francisco, CA

19        <sup>9</sup>Miami Cancer Institute, Miami, FL

20

21

22        Corresponding author: Justin D. Lathia ([lathiaj@ccf.org](mailto:lathiaj@ccf.org))

23

24        Running title: T cells drive sex differences in GBM

25

26        Total word count (6000): 5826

27        References (50): 46

28 **Abstract**

29 Sex differences in glioblastoma (GBM) incidence and outcome are well recognized, and emerging  
30 evidence suggests that these extend to genetic/epigenetic and cellular differences, including  
31 immune responses. However, the mechanisms driving immunological sex differences are not fully  
32 understood. Using GBM models, we demonstrate that T cells play a critical role in driving GBM  
33 sex differences. Male mice exhibited accelerated tumor growth, with decreased T cell infiltration  
34 and increased T cell exhaustion. Furthermore, a higher frequency of progenitor exhausted T cells  
35 was found in males, with improved responsiveness to anti-PD1 treatment. Bone marrow chimera  
36 and adoptive transfer models indicated that T cell-mediated tumor control was predominantly  
37 regulated in a cell-intrinsic manner, which was further corroborated by *in vitro* exhaustion assays.  
38 Moreover, increased T cell exhaustion was observed in male GBM patients. These findings  
39 demonstrate sex-specific pre-determined behavior of T cells is critical in inducing sex differences  
40 in GBM progression and immunotherapy response.

41

42

43 **Statement of significance**

44 Immunotherapies in GBM patients have been unsuccessful due to a variety of factors including  
45 the highly immunosuppressive tumor microenvironment in GBM. This study demonstrates that  
46 sex-specific T cell behaviors are predominantly intrinsically regulated, further suggesting sex-  
47 specific approaches can be leveraged to potentially improve therapeutic efficacy of  
48 immunotherapy in GBM.

## 49 **Introduction**

50 Glioblastoma (GBM) is the most common primary malignant brain tumor, and patients with GBM  
51 experience poor prognosis despite aggressive current standard-of-care therapies including  
52 surgical resection, radiotherapy, and chemotherapy with temozolomide (1). One reason that GBM  
53 is difficult to treat is its highly immunosuppressive tumor microenvironment (TME). GBM tumors  
54 are infiltrated with suppressive myeloid populations including macrophages, myeloid-derived  
55 suppressor cells (MDSCs), and microglia (2). A reduction in T cells in the circulation further  
56 contributes to poor anti-GBM immunity, with sequestration of naïve T cells in bone marrow and  
57 involution of primary and secondary lymphoid organs suggested as mechanisms of T cell  
58 reduction (3, 4). Clinical trials in GBM employing immune checkpoint inhibitors (ICIs) such as anti-  
59 PD1 and anti-CTLA4 monoclonal antibodies have generally not shown significant improvement in  
60 overall survival, even when used in combination therapies with existing treatment options (5-7),  
61 with an exception of a single trial that demonstrated a modest but statistically significant survival  
62 benefit when ICI was employed in the neoadjuvant setting (8). Given the unique TME and  
63 anatomical immune privilege in GBM, there is a pressing need to understand how to reinvigorate  
64 immune responses in GBM.

65 Adding to the complexity of GBM treatment is a sex difference in disease outcome, with male  
66 patients exhibiting a 1.6-fold higher incidence and poorer prognosis after treatment compared to  
67 female patients (9). While tumor-intrinsic factors underlying sex differences have been identified  
68 in GBM (10, 11), sex differences in anti-tumor immunity may also contribute. In general, females  
69 exhibit stronger immune responses than males, as mostly shown in autoimmune and infectious  
70 diseases, and the differences are attributed to sex hormones and/or sex chromosomes (12).  
71 Overall, male-biased prevalence of cancers in non-reproductive organs have been reported (13),  
72 yet the underlying mechanisms remain to be elucidated.

73 In many tumors, T cell function is disrupted, and addressing this has been the focus of many  
74 immunotherapies. T cell exhaustion refers to a dysfunctional state of T cells that is characterized  
75 by high expression of inhibitory receptors, poor effector function, and decreased proliferative  
76 potential and is mediated by epigenetic remodeling (14). Chronic antigen stimulation in infection  
77 and cancers induces T cell exhaustion, resulting in impaired control of disease. Exhausted T cells  
78 are comprised of two distinct subsets - stem-like/progenitor exhausted T cells with self-renewal  
79 properties, which then transition to the irreversible stage of terminally exhausted T cells.  
80 Progenitor exhausted T cells can temporarily differentiate into “effector-like” T cells in response  
81 to anti-PD1 blockade that effectively inhibit tumor growth (15, 16). Male-biased T cell exhaustion

82 was observed in a variety of cancers including melanoma and bladder cancer (17, 18),  
83 demonstrating that sex differences in T cell exhaustion lead to divergent disease outcomes in  
84 males and females. Whilst GBM is highly enriched with exhausted T cells (19), it remains unknown  
85 the extent to which sex-specific T cell exhaustion mediates the sex differences in GBM survival.

86 We previously demonstrated sex-specific behaviors of MDSC subsets in GBM (20). In this study,  
87 we hypothesized that the sex differences in response to GBM extend beyond the myeloid lineage  
88 and here, report sex differences in T cell exhaustion that underlie differential ICI response in GBM.

89

## 90 **Results**

### 91 **T cells are a critical driver of sex differences in GBM**

92 We have previously shown sex differences in survival using the syngeneic mouse glioma models  
93 SB28 and GL261 (20), with male mice experiencing a worse outcome than female mice. To  
94 investigate the role of immune cell populations in this sex-based survival difference, we utilized  
95 immunocompromised mouse strains with different degrees of immunodeficiency. Intracranial  
96 tumor implantation revealed that the sex-specific survival difference observed in wild-type mice  
97 was not present in immune-deficient NSG mice (**Fig. 1A**). For these survival assessments, we  
98 used a reduced number of tumor cells in NSG mice (SB28-10,000 cells/mouse, GL261-20,000  
99 cells/mouse) compared to wild-type mice (SB28-15,000 cells/mouse, GL261-25,000 cells/mouse)  
100 due to accelerated tumor growth in immune-deficient models. We also did not observe any  
101 difference in survival of NSG mice challenged with a lower number of tumor cells (**Supplementary**  
102 **Fig. 1A**). To further specify the immune cell population responsible for the survival difference  
103 observed in immunocompetent B6 mice, we used RAG1<sup>-/-</sup> mice that lack only mature T and B  
104 lymphocytes, while other innate immune cells remain intact. We observed no sex difference in  
105 survival outcomes in tumor-bearing RAG1<sup>-/-</sup> mice (**Fig. 1A**), suggesting a role for lymphocytes.  
106 The male-biased aggressive tumor growth was not due to elevated female immune responses  
107 against male-specific antigens expressed by the tumor cells (SB28 and GL261), as we confirmed  
108 that neither tumor cell line contains a Y chromosome (21) or expresses Y chromosome-encoded  
109 genes, particularly H-Y minor histocompatibility antigen encoding gene (*smcy*) (**Supplementary**  
110 **Fig. 1B-C**).

111 To understand immunological differences between male and female hosts, we profiled tumor-  
112 infiltrating immune cells using flow cytometry at two different time points (**Fig. 1B, Supplementary**

113 **Fig. 2A).** On day 8 post-tumor implantation, when T cells are expected to be fully primed and  
114 activated, there was increased CD45<sup>hi</sup> immune cell infiltration with tumor compared to the sham  
115 group. Males and females showed comparable levels of total immune cells as well as T cells at  
116 this early time point. On day 15 post-tumor implantation, when some mice start to show  
117 neurological symptoms as a result of an advanced tumor, we found that CD45<sup>hi</sup> immune cells  
118 were significantly higher in males compared to females. Further analysis revealed that immune  
119 cells in female tumors were more enriched in T cells (**Fig. 1B**), whereas male tumors had a higher  
120 ratio of macrophages (**Supplementary Fig. 2B**). We did not observe any major differences in  
121 other immune cell subsets on either day 8 or day 15 (**Supplementary Fig. 2B**).

122 To test whether sex differences in the diversity of the T cell receptor (TCR) repertoire affect T cell  
123 responsiveness to tumor antigens, we evaluated antigen-specific T cell responses by measuring  
124 the ovalbumin (OVA)-specific CD8<sup>+</sup> T cell population using a tetramer antibody after implantation  
125 of OVA-expressing tumor cells (SB28-OVA) into male and female wild-type B6 mice. Similar to  
126 polyclonal T cells (**Fig. 1B**), OVA-specific CD8<sup>+</sup> T cells were significantly higher in female mice  
127 (**Fig. 1C**). These data indicate that female T cells have the potential to be more reactive to the  
128 tumor antigen regardless of TCR diversity.

129 To further investigate the extent to which the sex difference in survival was driven by T cells, we  
130 transferred activated OT-I T cells into SB28-OVA tumor-bearing RAG1<sup>-/-</sup> mice. T cells were indeed  
131 responsible, in part, for the sex difference in survival, as male mice receiving male T cells  
132 exhibited significantly faster tumor growth compared to female mice receiving female T cells (**Fig.**  
133 **1D**), recapitulating the survival differences observed in the immunocompetent model (**Fig. 1A**).  
134 Taken together, these data suggest that T cells play an essential role in the sex differences in  
135 survival observed in mouse GBM models.

136

### 137 **Male T cells become exhausted more quickly than female T cells, with a higher frequency** 138 **of progenitor exhausted T cell subsets**

139 We next performed extensive immune cell profiling focused on T cells to understand how T cells  
140 underlie the sex differences in GBM progression. Increased CD8<sup>+</sup> and CD4<sup>+</sup> T cell populations  
141 were observed in female tumors compared to male tumors on day 15 post-tumor implantation,  
142 while the frequency of Foxp3<sup>+</sup> cells was comparable, indicating that the differences are likely from  
143 effector T cells (**Fig. 2A**). Next, we asked whether female T cells were primed and activated earlier,  
144 thereby more effectively attenuating tumor growth. To address this possibility, we evaluated

145 activated T cell phenotypes in the draining lymph nodes at earlier time points after tumor  
146 implantation (**Supplementary Fig. 3A**). No differences in phenotype or functionality were  
147 observed between male and female T cells in draining lymph nodes, indicating that differential  
148 kinetics of T cell activation was likely not the reason for the sex differences in T cell infiltration into  
149 tumors.

150 Further analysis revealed that male CD8<sup>+</sup> T cells express a higher frequency of inhibitory  
151 receptors, including PD1, CTLA4, and LAG3 but not TIM3, compared to female CD8<sup>+</sup> T cells (**Fig.**  
152 **2B**). Additionally, male CD8<sup>+</sup> T cells showed decreased levels of intracellular cytokine expression  
153 compared to female CD8<sup>+</sup> T cells following *ex vivo* stimulation (**Fig. 2C**). CD4<sup>+</sup>Foxp3<sup>-</sup> effector T  
154 cells showed differences such as expression of CTLA4 and LAG3, but these differences were not  
155 as prominent as in CD8<sup>+</sup> T cells. The differences were not observed at the early time point (day  
156 8, **Supplementary Fig. 3B-D**), consistent with the findings in **Fig. 1B**. We also confirmed these  
157 findings using another GBM model, GL261, which showed no clear difference in T cell frequency  
158 but differences in inhibitory receptor expression as well as TNF expression (**Supplementary Fig.**  
159 **4A-C**). These phenotypic differences were only observed in T cells infiltrating tumors, as no  
160 significant changes in inhibitory receptor and cytokine expression were found in T cells from blood  
161 and bone marrow (**Supplementary Fig. 5**).

162 The increased expression of inhibitory receptors and decreased cytokine expression in male  
163 CD8<sup>+</sup> T cells prompted us to hypothesize that male and female CD8<sup>+</sup> T cells exhibit differential  
164 exhaustion status. It is well established that exhausted CD8<sup>+</sup> T cells are comprised of two subsets,  
165 stem-like/progenitor exhausted CD8<sup>+</sup>T cells (**PEX**; CD8<sup>+</sup>CD44<sup>+</sup>PD1<sup>+</sup>TCF1<sup>+</sup>TIM3<sup>-</sup>) and terminally  
166 exhausted CD8<sup>+</sup> T cells (**TEX**; CD8<sup>+</sup>CD44<sup>+</sup>PD1<sup>+</sup>TCF1<sup>-</sup>TIM3<sup>+</sup>) (16). Therefore, we evaluated the  
167 frequency of exhausted T cell subsets and effector T cells (**EFF**; CD8<sup>+</sup>CD44<sup>+</sup>TCF1<sup>-</sup>TIM3<sup>-</sup>) in  
168 tumor-infiltrating CD8<sup>+</sup> T cells. Strikingly, male CD8<sup>+</sup> T cells contained a significantly higher ratio  
169 of PEX compared to female CD8<sup>+</sup> T cells, while female T cells had elevated frequencies of EFF  
170 (**Fig. 2D**). A higher frequency of the PEX subset in males was also observed in the GL261 model  
171 (**Supplementary Fig. 4D**). No difference was observed in the TEX population between male and  
172 female CD8<sup>+</sup> T cells (**Fig. 2D**) as well as at the early time point (**Supplementary Fig. 3E**).  
173 Intracellular expression of granzyme B confirmed the gating strategy for exhausted T cell subsets,  
174 as TEX showed the highest level of granzyme B, while PEX showed minimal expression as  
175 described previously (16)(**Fig. 2E**). As exhausted CD8<sup>+</sup> T cells have reduced capacity to produce  
176 multiple cytokines (16), we evaluated the proportion of cells simultaneously producing IFN- $\gamma$  and  
177 TNF. Interestingly, all three subsets of female CD8<sup>+</sup> T cells were more polyfunctional, , suggesting

178 that the fundamental sex difference in T cell functionality exists independent of exhaustion status  
179 (**Fig. 2F**). Collectively, these data indicate that male and female T cells undergo exhaustion at  
180 different rates, with higher progenitor exhausted T cells in males whereas higher effector cytokine  
181 production in female CD8<sup>+</sup> T cells, which may result in survival differences.

182

### 183 **Males benefit from anti-PD1 therapy more than females**

184 Progenitor exhausted T cells are better able to control tumor growth and respond to anti-PD1  
185 treatment (15, 16). Thus, we hypothesized that males will respond better than females to anti-  
186 PD1 monoclonal antibody (mAb) treatment due to the high frequency of progenitor cells in male  
187 tumors. To test this possibility, we treated male and female mice bearing SB28 tumors with anti-  
188 PD1 mAb or isotype antibody (**Fig. 3A**). In accordance with our prediction, anti-PD1 mAb  
189 treatment significantly extended the survival of male mice compared to the isotype-treated group  
190 (**Fig. 3B**). However, the treatment effect was mild in females, as previously reported (22).

191 To further interrogate the survival differences between males and females in response to anti-  
192 PD1 mAb treatment, we analyzed tumor infiltrating T cells using flow cytometry two days after the  
193 last treatment. The frequency of tumor-infiltrating CD8<sup>+</sup> T cells was increased in both males and  
194 females with anti-PD1 mAb treatment (**Fig. 3C**), while other immune cells in the tumor showed a  
195 similar trend regardless of sex (**Supplementary Fig. 6A**). PD1 expression was dramatically  
196 reduced in both CD8<sup>+</sup> and CD4<sup>+</sup> T cells with anti-PD1 mAb treatment, whereas CTLA4 and LAG3  
197 expression was not altered (**Supplementary Fig. 6B**). Interestingly, we observed a significant  
198 increase of Ki67<sup>+</sup> CD8<sup>+</sup> T cells (**Fig. 3D**) and CD4<sup>+</sup> effector T cells (**Supplementary Fig. 6C**) in  
199 males, suggesting that male T cells became more proliferative upon anti-PD1 mAb treatment.  
200 PD1 blockade also led to a significant decrease in the TEX and PEX subsets in males, whereas  
201 the decrease was moderate in females (**Fig. 3E**). Cytokine expression was elevated in both male  
202 and female CD8<sup>+</sup> T cells (**Fig. 3F**), but not in CD4<sup>+</sup> effector T cells (**Supplementary Fig. 6D**), with  
203 anti-PD1 mAb treatment. Taken together, these results indicate that anti-PD1 blockade was more  
204 effective on male T cells with significant changes in reducing exhausted T cell subsets and  
205 increasing proliferation compared to females, which may lead to survival benefit upon treatment  
206 in males.

207

### 208 **Immune cell-intrinsic regulation of sex differences in GBM**

209 Next, we asked whether the sex differences in T cell phenotypes and GBM survival were driven  
210 by a hematopoietic immune cell-intrinsic or cell-extrinsic manner. To test this, we generated sex-  
211 matched or mismatched bone marrow chimeras by transferring T cell-depleted bone marrow cells  
212 into lethally irradiated recipient mice (**Fig. 4A**). We depleted pre-existing T cells in the bone  
213 marrow to prevent an induction of graft-versus-host disease in female-to-male group as well as  
214 to newly generate T cells from the donor hematopoietic stem cells and fully matured in the  
215 recipients' thymus (**Supplementary Fig. 7A**). The immune components of the recipients were  
216 successfully reconstituted by the donor cells after 6 weeks (CD45.1<sup>+</sup> cells > 95%), and no  
217 significant difference in the frequency of circulating immune cells was observed at steady state  
218 (**Supplementary Fig. 7B**).

219 We first analyzed tumor-infiltrating lymphocytes in the bone marrow chimera mice 14 days after  
220 tumor implantation to assess the environmental effect on T cells. We found increased CD3<sup>+</sup> T cell  
221 infiltration in the female-to-female group (F to F; female control) compared to the male-to-male  
222 group (M to M; male control) in both CD8<sup>+</sup> T cells and CD4<sup>+</sup> T cells, but not in Foxp3<sup>+</sup> cells (**Fig.**  
223 **4B**), confirming that T cells in the bone marrow chimera recapitulate their behavior observed in  
224 the B6 wild-type mouse model (**Fig. 2A**). Interestingly, the frequency of infiltrating T cells in the  
225 male-to-female (M to F) group was significantly lower than in the F to F group but comparable to  
226 the M to M group, suggesting male leukocyte-intrinsic regulation. Meanwhile, the female-to-male  
227 (F to M) group showed a pattern more similar to the M to M group rather than the F to F group  
228 (**Fig. 4B**), indicating an influence of male environment on female cells. While there was no  
229 difference in inhibitory receptor expression (**Fig. 4C**), we found that the PEX subset was largely  
230 increased in the M to M group, with a significantly decreased EFF subset (**Fig. 4D**). No difference  
231 was observed in the TEX subset. Importantly, neither the M to F nor the F to M group showed an  
232 increase in the PEX subset, suggesting critical roles for a combined hematopoietic cell-intrinsic  
233 and cell-extrinsic effect on the higher frequency of PEX in male mice shown in **Fig. 2D**.

234 Next we performed survival analysis on the bone marrow chimera mice after implantation of SB28  
235 cells to assess immune cell-intrinsic and cell-extrinsic effects on tumor growth. The control groups,  
236 M to M and F to F, replicated the survival differences (**Fig. 4E**) as observed in intact B6 mice (**Fig.**  
237 **1A**). Reconstitution of female recipients with male immune cells (M to F) significantly shortened  
238 the survival of female mice similar to the M to M group, as we have previously shown (20), and  
239 the F to M group showed extended survival comparable to the F to F group. These data support  
240 that the sex of immune cell origin is a critical factor that determines tumor progression. Collectively,



241 these findings suggest that the sex difference in anti-tumor immunity is predominantly regulated  
242 in a hematopoietic immune cell-intrinsic manner but is also subject to environmental influences.

243

#### 244 **T cell-intrinsic regulation of sex differences**

245 Our findings in our *in vivo* models suggested that male and female T cells are activated to develop  
246 to different functional stages during tumor progression (**Fig. 2**). Thus, we hypothesized that male  
247 and female T cells undergo distinct types of cellular reprogramming in the highly suppressive  
248 tumor microenvironment. To test this hypothesis, we induced exhaustion of T cells *in vitro* by  
249 repeated stimulation (**Fig. 5A**). Compared to the cells stimulated only once, both male and female  
250 T cells showed increased expression of the exhaustion markers PD1, TIM3, and TOX upon  
251 repeated stimulation (**Fig. 5B**, upper panel). However, intracellular cytokine levels measured by  
252 flow cytometry after polyclonal stimulation (PMA/ionomycin) showed that female exhausted T  
253 cells retained their functionality, with higher expression of IFN- $\gamma$ , TNF, and granzyme B (**Fig. 5B**,  
254 lower panel). qPCR analysis confirmed that female exhausted T cells exhibited higher expression  
255 of genes encoding anti-tumor effector cytokines (*ifng*, *gzmb*, *il2*) and transcription factors related  
256 to effector functions (*tbx21*, *eomes*) (**Fig. 5C**). Interestingly, transcript levels of markers  
257 associated with exhaustion status were increased in female cells (*pdc11*, *havcr2*) or comparable  
258 (*tox*, *batf*, *irf4*, *tigit*) between male and female cells. These data suggest that male and female T  
259 cells may undergo distinct cell-intrinsic regulation of their functional state during exhaustion.

260 Next, we evaluated the intrinsic role of T cells in driving the observed sex differences in GBM  
261 survival. To avoid female T cell-mediated rejection of males, we utilized an adoptive transfer  
262 model using the OVA-OT-I system in RAG1<sup>-/-</sup> mice (**Fig. 5D**; as in **Fig. 1D**). Transfer of female T  
263 cells delivered a survival advantage to recipients, as female OT-I cells significantly extended  
264 survival of male recipients compared to the male-to-male group. In contrast, male OT-I cells  
265 shortened the survival of female recipients (**Fig. 5D**). These results indicate that the ability of T  
266 cells to control tumor growth is dominantly determined by the sex of the originating host, not the  
267 recipient's environment.

268

#### 269 **Male-biased T cell exhaustion in GBM patients and human T cells**

270 To investigate whether sex differences in T cells are recapitulated in human GBM patients, we  
271 analyzed exhausted CD8<sup>+</sup> T cell subsets from GBM patient tumors using flow cytometry. KLRG1

272 and PD1 expression was used to exclude the short-lived effector T cell population, and exhausted  
273 T cells subsets were determined based on expression of TCF1, TIM3, and CXCR5 (23) (**Fig. 6A**).  
274 There was no significant difference in the percentage of CD8<sup>+</sup> T cells and the PD1<sup>+</sup>KLRG1<sup>-</sup>  
275 population from male and female tumors (**Supplementary Fig. 8A**). Meanwhile, an increased  
276 frequency of progenitor exhausted T cells (CD8<sup>+</sup>KLRG1<sup>-</sup>PD1<sup>+</sup>CXCR5<sup>+</sup>TCF1<sup>+</sup>TIM3<sup>-</sup>) was found in  
277 male compared to female tumor samples (**Fig. 6B**), while no difference was observed in the  
278 subsets of terminally exhausted T cells (CD8<sup>+</sup>KLRG1<sup>-</sup>PD1<sup>+</sup>CXCR5<sup>-</sup>TCF1<sup>-</sup>TIM3<sup>+</sup>)  
279 (**Supplementary Fig. 8B**). Additionally, increased expression of the exhaustion marker TOX was  
280 found in CD8<sup>+</sup> T cells from male tumors (**Fig. 6C**), while the expression levels of other marker  
281 were comparable (**Supplementary Fig. 8C**). These results indicate that T cells from GBM  
282 patients exhibit a male-biased exhaustion status in line with our mouse model.

283 To further address sex differences in T cells under exhaustion conditions, we performed an *in*  
284 *vitro* exhaustion assay by repeatedly stimulating human CD8<sup>+</sup> T cells isolated from PBMCs of  
285 healthy volunteers (**Fig. 6D**). Both male and female T cells exhibited elevated expression levels  
286 of exhaustion markers (PD1, TIM3, TOX, CD39) after repeated stimulation for 12 days compared  
287 to their singly stimulated counterparts (**Fig. 6E**). Intracellular cytokine expression analysis  
288 revealed that the ability of T cells to produce dual cytokines dramatically decreased after the  
289 second stimulation (day 6), while female CD8<sup>+</sup> T cells consistently expressed higher levels of IFN-  
290  $\gamma$  and TNF compared to male cells (**Fig. 6F**). Interestingly, qPCR analysis showed significantly  
291 higher expression of a set of transcription factors related to T cell exhaustion (*IRF4*, *TOX*, *TCF1*,  
292 *EOMES*, *MYC*) in female T cells on day 6, but not on day 12, which suggests differential  
293 transcriptional regulation in male and female T cells (**Supplementary Fig. 8D**).

294 Taken together, our findings indicate that male T cells are more prone to exhaustion, which leads  
295 to accelerated tumor growth in males but potentially provides them with a larger benefit from anti-  
296 PD1 mAb therapy, whereas female T cells tend to maintain higher functionality and protect the  
297 host from tumor progression (**Fig. 6G**).

298

## 299 **Discussion**

300 Sex differences are emerging as a major contributor to cancer progression and therapeutic  
301 response through distinct genetic, epigenetic, and immunological mechanisms (24, 25). We  
302 previously reported a sex difference in MDSC localization in GBM whereby males had increased  
303 m-MDSCs in the TME while females had increased g-MDSCs in the periphery. This difference

304 was leveraged for the development of sex-specific therapies that were validated in pre-clinical  
305 models (20). Importantly, while functional and targetable sex-differences present within certain  
306 myeloid populations, we demonstrate here that GBM-infiltrating T cells actually mediate sex  
307 difference in overall survival. Using pre-clinical models and human patient validation, we  
308 demonstrate increased T cell exhaustion in males compared to females, with males displaying an  
309 enhanced response to single-agent ICI treatment. Mechanistically, the T cell-dependent survival  
310 difference was predominantly due to hematopoietic immune cell-intrinsic differences along with  
311 the impact of environment including sex hormones.

312 Our observation that males are more responsive to single-agent ICI treatment, based on sex  
313 differences in T cell exhaustion and inhibitor receptor expression, supports clinical trial data in  
314 many cancers whereby males show an enhanced therapeutic response and females develop  
315 more adverse events (26-28). The latter observation is likely due to enhanced immune activation  
316 status in women. Interestingly, in lung cancer patients, females showed an enhanced response  
317 to PD1/PD-L1 when combined with chemotherapy compared to males (29), suggesting that  
318 additional stimuli are required to activate an anti-tumor immune response in females. For GBM,  
319 this will likely be needed, as ICI monotherapies have not shown strong clinical benefit and current  
320 immunotherapy strategies are now focused on combination therapies (30). Furthermore,  
321 immediate priorities currently include sex-specific assessment of combination strategies in pre-  
322 clinical models and using sex as stratification criteria for early-stage clinical trials.

323 Our pre-clinical data also demonstrate that male T cells are more exhausted than female T cells,  
324 which has also recently been seen in several malignancies including melanoma, colon cancer,  
325 and bladder cancer models (17, 18). These observations were also validated in human GBM  
326 patients and are consistent with reports in melanoma patients (31) but opposite to what has been  
327 observed in lung cancer patients (32). While both of these tumors are more responsive to ICIs  
328 than GBM (33, 34) and have an increased mutational burden compared to GBM (35), it is unclear  
329 why there are differences and why GBM appears to more closely phenocopy melanoma. This is  
330 likely to be due to a combination of differences in driver mutations, standard-of-care therapies,  
331 and anatomical locations. For GBM in particular, the specialized neural-immune  
332 microenvironment is likely to provide unique stimuli (36), and sex differences in other neural cell  
333 types may also impact T cell function. Future studies focusing on the interaction between brain-  
334 specific mechanisms and T cells are likely to help clarify the molecular underpinnings of sex  
335 differences in T cell function and may reveal sex-specific mechanisms that could be leveraged for  
336 next-generation therapies.

337 Androgen in particular has recently received attention for its role in regulating T cell exhaustion,  
338 with contradictory molecular mechanisms (17, 18). These groups have shown that blockade of  
339 androgen receptor signaling restored CD8<sup>+</sup> T cell function, with increased responsiveness in anti-  
340 PD1/PD-L1 treatment in males, in line with a previous report on castration-resistant prostate  
341 cancer (37). Our *in vitro* data, however, along with our adoptive transfer studies and bone marrow  
342 chimera studies, suggest a predominant cell-intrinsic underpinning of male T cell exhaustion. We  
343 reached these conclusions based on the maintained difference in T cell exhaustion in males  
344 versus females *ex vivo*, in the absence of the influence of sex hormones. Yet this does not rule  
345 out the possibility that the initial impact of sex hormones on stem cell stage or pre-isolation have  
346 been maintained through epigenetic memory, which needs further investigation. These cell-  
347 intrinsic differences could be potentially derived from sex chromosomes via expression of genes  
348 escaping X chromosome inactivation or micro-RNAs highly enriched in X chromosomes (38).  
349 Differential expression of epigenetic regulators encoded on sex chromosomes and their roles in  
350 immune responses have been reported (39-41), suggesting the possibility of sex-specific  
351 epigenetic reprogramming of T cells. Given that sex differences in GBM are observed throughout  
352 all age groups, while sex hormone levels vary (42), delineating the effects of sex hormones and  
353 sex chromosomes in sexually dimorphic GBM immunity requires further investigation.

354 Sex differences in T cell responses in GBM are likely derived from a combination of sex hormone-  
355 derived influences and cell-intrinsically derived influences. The molecular drivers of these and  
356 how the two intersect should be the focus of future studies to better enable us to understand  
357 immunological sex differences and tailor therapies accordingly. Additionally, an aspect outside of  
358 the scope of this study but still of pressing interest is the extent to which sex differences in antigen-  
359 presenting cells are present and affect T cell behavior. A meta-analysis on GBM clinical trials  
360 employing autologous dendritic cells showed that female patients had a more robust survival  
361 advantage compare to male patients, providing a rationale to understand underlying mechanisms  
362 (43). Taken together, our study identifies T cells as a critical component driving sex differences  
363 in GBM progression and a male-biased T cell exhaustion state that could potentially interrogate  
364 sex-specific immunotherapy responses in cancer patients. Our study provides insight into the  
365 immunological mechanisms underlying sex differences in GBM and further emphasizes a need  
366 for sex-specific treatment strategies.

## 367 **Materials and Methods**

### 368 **Cell lines**

369 The syngeneic mouse GBM cell lines SB28 and ovalbumin-overexpressing SB28 were kindly  
370 gifted by Dr. Hideho Okada (UCSF). GL261 cells were obtained from the Developmental  
371 Therapeutic Program, National Cancer Institute (Bethesda, MD). All cell lines were maintained in  
372 complete RPMI1640 (Media Preparation Core, Cleveland Clinic) supplemented with 10% FBS  
373 (Thermo Fisher Scientific), 1% penicillin/streptomycin (Media Preparation Core) and GlutaMAX  
374 (Gibco). Cells were maintained in humidified incubators held at 37°C and 5% CO<sub>2</sub> and not grown  
375 for more than 15 passages.

### 376 **Mice**

377 All animal procedures were performed in accordance with the guidelines of the Cleveland Clinic  
378 Institutional Animal Care and Use Committee. C57BL/6 (RRID:IMSR\_JAX:000664), B6 CD45.1  
379 (B6.SJL-Ptprc<sup>a</sup>Pepc<sup>b</sup>/BoyJ; RRID:IMSR\_JAX:002014), RAG1<sup>-/-</sup> (B6.129S7-Rag1tm1Mom/J;  
380 RRID:IMSR\_JAX:002216), and OT-I TCR transgenic (C57BL/6-Tg(TcraTcrb)1100Mjb/J;  
381 RRID:IMSR\_JAX:003831) mice were purchased from the Jackson Laboratory as required. NSG  
382 (NOD.Cg-Prkdc<sup>scid</sup>Il2rg<sup>tm1Wjl</sup>/SzJ) mice were obtained from the Biological Research Unit (BRU) at  
383 Lerner Research Institute, Cleveland Clinic. All animals were housed in specific-pathogen-free  
384 facility of the BRU with a light-dark period of 12 h each.

385 For tumor implantation, 5-6 week-old mice were anesthetized, fit to the stereotaxic apparatus,  
386 and intracranially injected with 10,000-25,000 tumor cells in 5 µl RPMI-null media into the left  
387 hemisphere approximately 0.5 mm rostral and 1.8 mm lateral to the bregma with 3.5 mm depth  
388 from the scalp. In some experiment, 5 µl null-media was injected into age- and sex-matched  
389 animals for sham controls. Animals were monitored over time for the presentation of neurological  
390 and behavioral symptoms associated with the presence of a brain tumor.

391 In some experiments, mice were treated with anti-PD1 (BioXcell, Cat# BE0273; RRID:  
392 AB\_2687796) or isotype antibody (BioXcell, Cat# BE0089, RRID:AB\_1107769) intraperitoneally  
393 starting from 7 days post-tumor implantation, and injections were repeated every 2-3 days for five  
394 times.

395 In the adoptive transfer model, RAG1<sup>-/-</sup> mice received intracranial injection of SB28-OVA tumor  
396 cells (15,000 cells/mouse). OT-I splenocytes were activated *in vitro* with 2 µg of SIINFEKL  
397 peptides (Sigma) in the presence of recombinant human IL-2 (50 U/ml, Peprotech) for 3 days.

398 Activated CD8<sup>+</sup> T cells (5x10<sup>6</sup> cells/mouse) were transferred intravenously into SB28-OVA tumor-  
399 bearing mice on day 7 post-tumor implantation.

400 To generate bone marrow chimeras, 5-week-old B6. CD45.2 male and female mice were  
401 irradiated with 12 Gy in total given in two fractions 3-4 hours apart. Bone marrow cells were  
402 obtained from tibias and femurs of 5-week-old B6. CD45.1 mice, and existing T cells were  
403 depleted using Thy1.2 (BioXcell, Cat# BE0066, RRID:AB\_1107682) and rabbit complement. A  
404 total of 5x10<sup>6</sup> T cell-depleted bone marrow cells were injected retro-orbitally into the irradiated  
405 recipients. Animals were given Sulfatrim in drinking water for 2 weeks to prevent infection. After  
406 6-8 weeks, animals were subjected to tumor implantation.

### 407 **Immunophenotyping by flow cytometry**

408 At the indicated time points, a single-cell suspension was prepared from the tumor-bearing left  
409 hemisphere by enzymatic digestion using collagenase IV (Sigma) and DNase I (Sigma), followed  
410 by straining with a 40- $\mu$ m filter. Cells were stained with LIVE/DEAD Fixable stains (Thermo Fisher)  
411 on ice for 15 min. After washing with PBS, cells were resuspended in Fc receptor blocker (Miltenyi  
412 Biotec) diluted in PBS/2% BSA and incubated on ice for 10 min. For surface staining,  
413 fluorochrome-conjugated antibodies were diluted in Brilliant buffer (BD) at 1:100 – 1:250, and  
414 cells were incubated on ice for 30 min. After washing with PBS-2% BSA buffer, cells were then  
415 fixed with FOXP3/Transcription Factor Fixation Buffer (eBioscience) overnight. For tetramer  
416 staining, cells were incubated with tetramer antibody diluted in PBS/2% BSA at 1:1000 dilution  
417 after the FcR blocker step on ice for 30 min, followed by surface staining. For intracellular staining,  
418 antibodies were diluted in FOXP3/Transcription Factor permeabilization buffer at 1:250-1:500,  
419 and cells were incubated at room temperature for 45 min. For intracellular cytokine detection,  
420 cells were stimulated using Cell Stimulation Cocktail plus protein transport inhibitor (eBioscience)  
421 in complete RPMI for 4 hours. After stimulation, cells were subjected to the staining procedures  
422 described above. Stained cells were acquired with a BD LSR Fortessa (BD) or Aurora (Cytex)  
423 and analyzed using FlowJo software (v10, BD Biosciences).

### 424 **Reagents**

425 For immunophenotyping in mouse models, the following fluorophore-conjugated antibodies were  
426 used: CD11b (M1/70, Cat# 563553), CD11c (HL3, Cat# 612796), Ly6G (1A8, Cat# 560603), CD3  
427 (145-2C11, Cat# 564379), CD44 (IM7, Cat# 612799) from BD biosciences. CTLA4 (UC10-4B9,  
428 Cat# 106312), PD1 (29F.1A12, Cat# 135241), B220 (RA3-6B2, Cat# 103237), Ki-67 (11Fb, Cat#  
429 151215), TIM3 (RMT3-23, Cat# 119727), I-A/I-E (M5/114.15.2, Cat# 107606), CD45 (30-F11,

430 Cat# 103132), LAG3 (C9B7W, Cat# 125224), NK1.1 (PK136, Cat# 108716), CD4 (GK1.5, Cat#  
431 100422), CD8 (6206.7, Cat# 100712), Ly6C (HK1.4, Cat# 128024), CD68 (FA-11, Cat# 137024),  
432 granzyme B (QA18A28, Cat# 396413), TNF (MP6-XT22, Cat# 506329), IFN- $\gamma$  (XMG1.2, Cat#  
433 505846) were obtained from BioLegend. Anti-Foxp3 (FJK-16s, Cat# 12-5773) antibody was  
434 obtained from eBioscience. Anti-TOX (TXRX10, Cat# 12-6502) antibody was purchased from  
435 Invitrogen, and anti-TCF1 (C63D9, Cat# 6709S) antibody was obtained from Cell Signaling  
436 Technology. For the tetramer assay, anti-CD8 antibody (KT15, Cat# ab22504) was obtained from  
437 Abcam, and PE-conjugated H-2K(b) SIINFEKL tetramer was provided by the NIH Tetramer Core  
438 Facility.

439 For analysis of GBM patient samples, the following fluorophore-conjugated antibodies were used:  
440 CD45 (HI30, Cat# 563791), CD3 (SP34-2, Cat# 557757), CD4 (SK3, Cat# 612749), PD1 (EH12.2,  
441 Cat# 564104), CTLA4 (BN13, 561717) were obtained from BD Biosciences. CD8 (RPA-T8, Cat#  
442 301038) and TIGIT (A15153G, Cat# 372718), KLRG1 (2F1/KLRG1, Cat# 138415), TIM3 (F38-  
443 2E2, Cat# 345030), TBET (4B10, Cat# 644817) were purchased from BioLegend. Anti-CD39 (A1,  
444 Cat# 67-0399) antibody was obtained from eBioscience. Anti-TOX and anti-TCF1 antibodies were  
445 obtained as described above.

#### 446 **In vitro generation of exhausted T cells**

447 To induce exhaustion of mouse T cells, CD8<sup>+</sup> T cells were isolated from splenocytes of OT-I mice  
448 using a magnetic bead isolation kit (Stemcell Technology) and cultured following a previously  
449 published protocol (44). In brief, 10 ng of SIINFEKL peptides was added into the culture every  
450 day until day 5 (repeated stimulation), or for single stimulation, peptides were added only once on  
451 day 0, and cells were washed on day 2 and rested until day 5.

452 To induce exhaustion of human T cells, blood was obtained from healthy volunteers upon written  
453 consent following the Cleveland Clinic Institutional Review Board (IRB; IRB07-918). Fresh  
454 peripheral blood mononuclear cells (PBMCs) were isolated using a Ficoll density gradient, and  
455 CD8<sup>+</sup> T cells were subsequently isolated using the Stemcell human CD8<sup>+</sup> isolation kit (Stemcell  
456 Technology) following the manufacturer's instructions. Induction of T cell exhaustion was  
457 performed following the previously published method with modification (45). Briefly, cells were  
458 cultured in complete RPMI containing recombinant human IL-2 (30 U/ml, Peprotech) and  
459 stimulated with anti-CD3/anti-CD28 Dynabeads (Invitrogen) at a bead:cell ratio of 1:10. Every  
460 three days, cells were harvested, washed, and cultured with fresh beads, for up to 12 days. For

461 single-stimulated controls, cells were harvested on day 3 and cultured without further stimulation  
462 for up to 12 days.

### 463 **Real-time quantitative PCR**

464 Total RNA was isolated using an RNeasy mini kit (Qiagen), and cDNA was synthesized using the  
465 High-capacity cDNA Reverse Transcription Kit (Applied Biosystems). qPCR reactions were  
466 performed using Fast SYBR-Green Mastermix (Thermo Fisher Scientific) on an Applied  
467 Biosystems StepOnePlus Real-Time PCR system. The threshold cycle (Ct) value for each gene  
468 was normalized to the expression levels of *gapdh* (mouse) or *ACTIN* (human), and relative  
469 expression was calculated by normalizing to the delta Ct value of one male T cell data point.  
470 Primer sequences were obtained from PrimerBank (46), and primer sequences are listed in Table  
471 S1 (mouse) and Table S2 (human).

### 472 **GBM patient samples**

473 Cryopreserved single-cell suspension samples were obtained from the Rosa Ella Burkhardt Brain  
474 Tumor Bank in accordance with the Cleveland Clinic Institutional Review Board (IRB2559).  
475 Samples from GBM patients diagnosed as IDH (Isocitrate dehydrogenase) mutations were  
476 excluded from our study. Cells were thawed in a 37°C water bath and washed twice with warm  
477 complete RPMI. Cells were stained with LIVE/DEAD Fixable Stains for 15 min on ice and washed,  
478 followed by incubation with Fc receptor blocker (Miltenyi Biotec) for 15 min on ice. Surface marker  
479 staining was performed for 30 min on ice with following antibodies: CD45, CD3, CD4, CD8, CD44,  
480 PD1, TIM3, CD39, KLRG1, TIGIT. Cells were then fixed with FOXP3/Transcription factor fixation  
481 buffer (Invitrogen) overnight at 4°C, and intracellular staining was performed in permeabilization  
482 buffer for following markers: TBET, TCF1, CTLA4, TOX. Stained samples were acquired by Cytex  
483 Aurora and analyzed by FlowJo software.

### 484 **Statistical Analysis**

485 GraphPad Prism (Version 9, GraphPad Software Inc. RRID:SCR\_002798) software was used for  
486 data presentation and statistical analysis. Unpaired *t* test or one-way/two-way analysis of variance  
487 (ANOVA) was used with a multiple comparison test as indicated in the figure legend. Survival  
488 analysis was performed by log-rank test. *p*-value <0.05 was considered significant (\**p*<0.05,  
489 \*\**p*<0.01, \*\*\**p*<0.001).

490

491



492 **Author's contributions**

493 Conception and design: J.L., M.N., J.D.L.

494 Development of methodology: J.L., M.N.

495 Acquisition of data: J.L., D.J.S., C.L., D.B., D.C.W., A.L.

496 Analysis and interpretation of data: J.L., M.N., R.L.F., J.D.L.

497 Writing, review: J.L., M.N., D.J.S., A.D., W.G., S.J.C., A.V., R.L.F., M.S.A., J.D.L.

498 Administrative, technical, or material support: S.J., M.M., M.M.G., D.D.K., A.D., W.G., S.J.C., A.V.,  
499 R.L.F., H.O., M.S.A., J.D.L.

500 Study supervision: J.D.L.

501

502 **Acknowledgements**

503 We thank the members of the Lathia laboratory for insightful discussions. We are grateful to Drs.  
504 Jill Barnholtz-Sloan (National Cancer Institute), Josh Rubin (Washing University in St. Louis), Jim  
505 Connor (Penn State College of Medicine) and Mike Berens (TGEN) for their useful suggestions.  
506 We greatly appreciate the editorial assistance of Dr. Erin Mulkearns-Hubert (Cleveland Clinic)  
507 and illustrative work of Ms. Amanda Mendelsohn from the Center for Medical Art and Photography  
508 at the Cleveland Clinic for illustrative work. We would like to acknowledge the technical help from  
509 Cleveland Clinic Flow Cytometry Core. We also thank the NIH Tetramer Core Facility (contract  
510 number 75N93020D00005) for providing H-2K SIINFEKL tetramers. This work is supported by  
511 National Institutes of Health grants R35 NS127083 (J.D.L.), P01 CA245705 (J.D.L.), K99  
512 CA248611 (D.B.), R35NS105068 (H.O.), F30CA250254 (A.L.), T32GM007250 (A.L.), R01  
513 HL158801 (S.J.C.), T32 5T32AI007024-40 (D.C.W), TL1 5TL1TR002549-03 (D.C.W.). This work  
514 was also supported the American Brain Tumor Association (J.D.L.), Case Comprehensive Cancer  
515 Center (J.D.L.), Cleveland Clinic/Lerner Research Institute (J.D. L.) and the American Society of  
516 Transplantation Research Network (M.N.).

517

518 **Disclosures**

519 The authors declare no competing interests.

520 **References**

- 521 1. Stupp R, Taillibert S, Kanner A, Read W, Steinberg D, Lhermitte B, et al. Effect of Tumor-  
522 Treating Fields Plus Maintenance Temozolomide vs Maintenance Temozolomide Alone on  
523 Survival in Patients With Glioblastoma: A Randomized Clinical Trial. *Jama*. 2017;318(23):2306-  
524 16.
- 525 2. Quail DF, Joyce JA. The Microenvironmental Landscape of Brain Tumors. *Cancer Cell*.  
526 2017;31(3):326-41.
- 527 3. Chongsathidkiet P, Jackson C, Koyama S, Loebel F, Cui X, Farber SH, et al.  
528 Sequestration of T cells in bone marrow in the setting of glioblastoma and other intracranial tumors.  
529 *Nature medicine*. 2018;24(9):1459-68.
- 530 4. Ayasoufi K, Pfaller CK, Evgin L, Khadka RH, Tritz ZP, Goddery EN, et al. Brain cancer  
531 induces systemic immunosuppression through release of non-steroid soluble mediators. *Brain*.  
532 2020;143(12):3629-52.
- 533 5. Reardon DA, Brandes AA, Omuro A, Mulholland P, Lim M, Wick A, et al. Effect of  
534 Nivolumab vs Bevacizumab in Patients With Recurrent Glioblastoma: The CheckMate 143 Phase  
535 3 Randomized Clinical Trial. *JAMA oncology*. 2020;6(7):1003-10.
- 536 6. Omuro A, Reardon DA, Sampson JH, Baehring J, Sahebjam S, Cloughesy TF, et al.  
537 Nivolumab plus radiotherapy with or without temozolomide in newly diagnosed glioblastoma:  
538 Results from exploratory phase I cohorts of CheckMate 143. *Neurooncol Adv*. 2022;4(1):vdac025.
- 539 7. Medikonda R, Dunn G, Rahman M, Fecci P, Lim M. A review of glioblastoma  
540 immunotherapy. *J Neurooncol*. 2021;151(1):41-53.
- 541 8. Cloughesy TF, Mochizuki AY, Orpilla JR, Hugo W, Lee AH, Davidson TB, et al.  
542 Neoadjuvant anti-PD-1 immunotherapy promotes a survival benefit with intratumoral and  
543 systemic immune responses in recurrent glioblastoma. *Nat Med*. 2019;25(3):477-86.
- 544 9. Ostrom QT, Rubin JB, Lathia JD, Berens ME, Barnholtz-Sloan JS. Females have the  
545 survival advantage in glioblastoma. *Neuro-oncology*. 2018;20(4):576-7.
- 546 10. Ippolito JE, Yim AK, Luo J, Chinnaiyan P, Rubin JB. Sexual dimorphism in glioma  
547 glycolysis underlies sex differences in survival. *JCI Insight*. 2017;2(15).
- 548 11. Yang W, Warrington NM, Taylor SJ, Whitmire P, Carrasco E, Singleton KW, et al. Sex  
549 differences in GBM revealed by analysis of patient imaging, transcriptome, and survival data.  
550 *Science translational medicine*. 2019;11(473).
- 551 12. Klein SL, Flanagan KL. Sex differences in immune responses. *Nature reviews*  
552 *Immunology*. 2016;16(10):626-38.

- 553 13. Rubin JB, Lagas JS, Broestl L, Sponagel J, Rockwell N, Rhee G, et al. Sex differences in  
554 cancer mechanisms. *Biol Sex Differ*. 2020;11(1):17.
- 555 14. Belk JA, Daniel B, Satpathy AT. Epigenetic regulation of T cell exhaustion. *Nat Immunol*.  
556 2022;23(6):848-60.
- 557 15. Siddiqui I, Schaeuble K, Chennupati V, Fuertes Marraco SA, Calderon-Copete S, Pais  
558 Ferreira D, et al. Intratumoral Tcf1(+)/PD-1(+)/CD8(+) T Cells with Stem-like Properties Promote  
559 Tumor Control in Response to Vaccination and Checkpoint Blockade Immunotherapy. *Immunity*.  
560 2019;50(1):195-211.e10.
- 561 16. Miller BC, Sen DR, Al Aboosy R, Bi K, Virkud YV, LaFleur MW, et al. Subsets of exhausted  
562 CD8(+) T cells differentially mediate tumor control and respond to checkpoint blockade. *Nat*  
563 *Immunol*. 2019;20(3):326-36.
- 564 17. Yang C, Jin J, Yang Y, Sun H, Wu L, Shen M, et al. Androgen receptor-mediated CD8(+)  
565 T cell stemness programs drive sex differences in antitumor immunity. *Immunity*.  
566 2022;55(7):1268-83.e9.
- 567 18. Kwon H, Schafer JM, Song NJ, Kaneko S, Li A, Xiao T, et al. Androgen conspires with the  
568 CD8(+) T cell exhaustion program and contributes to sex bias in cancer. *Sci Immunol*.  
569 2022;7(73):eabq2630.
- 570 19. Woroniecka K, Chongsathidkiet P, Rhodin K, Kemeny H, Dechant C, Farber SH, et al. T-  
571 Cell Exhaustion Signatures Vary with Tumor Type and Are Severe in Glioblastoma. *Clin Cancer*  
572 *Res*. 2018;24(17):4175-86.
- 573 20. Bayik D, Zhou Y, Park C, Hong C, Vail D, Silver DJ, et al. Myeloid-Derived Suppressor  
574 Cell Subsets Drive Glioblastoma Growth in a Sex-Specific Manner. *Cancer discovery*.  
575 2020;10(8):1210-25.
- 576 21. Xu J, Peng X, Chen Y, Zhang Y, Ma Q, Liang L, et al. Free-living human cells reconfigure  
577 their chromosomes in the evolution back to uni-cellularity. *Elife*. 2017;6.
- 578 22. Genoud V, Marinari E, Nikolaev SI, Castle JC, Bukur V, Dietrich PY, et al. Responsiveness  
579 to anti-PD-1 and anti-CTLA-4 immune checkpoint blockade in SB28 and GL261 mouse glioma  
580 models. *Oncoimmunology*. 2018;7(12):e1501137.
- 581 23. Dolina JS, Van Braeckel-Budimir N, Thomas GD, Salek-Ardakani S. CD8(+) T Cell  
582 Exhaustion in Cancer. *Front Immunol*. 2021;12:715234.
- 583 24. Pala L, De Pas T, Catania C, Giaccone G, Mantovani A, Minucci S, et al. Sex and cancer  
584 immunotherapy: Current understanding and challenges. *Cancer Cell*. 2022;40(7):695-700.
- 585 25. Haupt S, Caramia F, Klein SL, Rubin JB, Haupt Y. Sex disparities matter in cancer  
586 development and therapy. *Nat Rev Cancer*. 2021;21(6):393-407.

- 587 26. Wallis CJD, Butaney M, Satkunasivam R, Freedland SJ, Patel SP, Hamid O, et al.  
588 Association of Patient Sex With Efficacy of Immune Checkpoint Inhibitors and Overall Survival in  
589 Advanced Cancers: A Systematic Review and Meta-analysis. *JAMA Oncol.* 2019;5(4):529-36.
- 590 27. Unger JM, Vaidya R, Albain KS, LeBlanc M, Minasian LM, Gotay CC, et al. Sex  
591 Differences in Risk of Severe Adverse Events in Patients Receiving Immunotherapy, Targeted  
592 Therapy, or Chemotherapy in Cancer Clinical Trials. *J Clin Oncol.* 2022;40(13):1474-86.
- 593 28. Conforti F, Pala L, Pagan E, Corti C, Bagnardi V, Queirolo P, et al. Sex-based differences  
594 in response to anti-PD-1 or PD-L1 treatment in patients with non-small-cell lung cancer  
595 expressing high PD-L1 levels. A systematic review and meta-analysis of randomized clinical trials.  
596 *ESMO Open.* 2021;6(5):100251.
- 597 29. Conforti F, Pala L, Bagnardi V, Viale G, De Pas T, Pagan E, et al. Sex-Based  
598 Heterogeneity in Response to Lung Cancer Immunotherapy: A Systematic Review and Meta-  
599 Analysis. *J Natl Cancer Inst.* 2019;111(8):772-81.
- 600 30. Lim M, Xia Y, Bettgowda C, Weller M. Current state of immunotherapy for glioblastoma.  
601 *Nat Rev Clin Oncol.* 2018;15(7):422-42.
- 602 31. Loo K, Tsai KK, Mahuron K, Liu J, Pauli ML, Sandoval PM, et al. Partially exhausted tumor-  
603 infiltrating lymphocytes predict response to combination immunotherapy. *JCI Insight.* 2017;2(14).
- 604 32. Conforti F, Pala L, Pagan E, Bagnardi V, De Pas T, Queirolo P, et al. Sex-Based  
605 Dimorphism of Anticancer Immune Response and Molecular Mechanisms of Immune Evasion.  
606 *Clin Cancer Res.* 2021;27(15):4311-24.
- 607 33. Hodi FS, O'Day SJ, McDermott DF, Weber RW, Sosman JA, Haanen JB, et al. Improved  
608 survival with ipilimumab in patients with metastatic melanoma. *N Engl J Med.* 2010;363(8):711-  
609 23.
- 610 34. Herbst RS, Baas P, Kim DW, Felip E, Pérez-Gracia JL, Han JY, et al. Pembrolizumab  
611 versus docetaxel for previously treated, PD-L1-positive, advanced non-small-cell lung cancer  
612 (KEYNOTE-010): a randomised controlled trial. *Lancet.* 2016;387(10027):1540-50.
- 613 35. Schaettler MO, Richters MM, Wang AZ, Skidmore ZL, Fisk B, Miller KE, et al.  
614 Characterization of the Genomic and Immunologic Diversity of Malignant Brain Tumors through  
615 Multisector Analysis. *Cancer Discov.* 2022;12(1):154-71.
- 616 36. Zhao F, Li B, Yang W, Ge T, Cui R. Brain-immune interaction mechanisms: Implications  
617 for cognitive dysfunction in psychiatric disorders. *Cell Prolif.* 2022:e13295.
- 618 37. Guan X, Polesso F, Wang C, Sehrawat A, Hawkins RM, Murray SE, et al. Androgen  
619 receptor activity in T cells limits checkpoint blockade efficacy. *Nature.* 2022;606(7915):791-6.

- 620 38. Libert C, Dejager L, Pinheiro I. The X chromosome in immune functions: when a  
621 chromosome makes the difference. *Nat Rev Immunol.* 2010;10(8):594-604.
- 622 39. Meester I, Manilla-Muñoz E, León-Cachón RBR, Paniagua-Frausto GA, Carrión-Alvarez  
623 D, Ruiz-Rodríguez CO, et al. SeXY chromosomes and the immune system: reflections after a  
624 comparative study. *Biol Sex Differ.* 2020;11(1):3.
- 625 40. Qi S, Al Mamun A, Ngwa C, Romana S, Ritzel R, Arnold AP, et al. X chromosome escapee  
626 genes are involved in ischemic sexual dimorphism through epigenetic modification of  
627 inflammatory signals. *J Neuroinflammation.* 2021;18(1):70.
- 628 41. Cheng MI, Riggan L, Li JH, Tafti RY, Chin S, Ma F, et al. Sex differences in NK cells  
629 mediated by the X-linked epigenetic regulator UTX. *bioRxiv.* 2022:2022.04.21.489076.
- 630 42. Ostrom QT, Kinnersley B, Wrensch MR, Eckel-Passow JE, Armstrong G, Rice T, et al.  
631 Sex-specific glioma genome-wide association study identifies new risk locus at 3p21.31 in  
632 females, and finds sex-differences in risk at 8q24.21. *Sci Rep.* 2018;8(1):7352.
- 633 43. Shireman JM, Ammanuel S, Eickhoff JC, Dey M. Sexual dimorphism of the immune  
634 system predicts clinical outcomes in glioblastoma immunotherapy: A systematic review and meta-  
635 analysis. *Neurooncol Adv.* 2022;4(1):vdac082.
- 636 44. Zhao M, Kiernan CH, Stairiker CJ, Hope JL, Leon LG, van Meurs M, et al. Rapid in vitro  
637 generation of bona fide exhausted CD8+ T cells is accompanied by Tcf7 promotor methylation.  
638 *PLoS Pathog.* 2020;16(6):e1008555.
- 639 45. Dunsford LS, Thoires RH, Rathbone E, Patakas A. A Human In Vitro T Cell Exhaustion  
640 Model for Assessing Immuno-Oncology Therapies. In: Tan S-L, editor. *Immuno-Oncology:  
641 Cellular and Translational Approaches.* New York, NY: Springer US; 2020. p. 89-101.
- 642 46. Spandidos A, Wang X, Wang H, Seed B. PrimerBank: a resource of human and mouse  
643 PCR primer pairs for gene expression detection and quantification. *Nucleic Acids Res.*  
644 2010;38(Database issue):D792-9.

645

646 **Figure Legends**

647 **Figure 1. T cells drive sex differences in GBM survival.** (A) Survival analysis was performed  
648 after intracranial injection of mouse GBM cell lines SB28 and GL261 in immunocompetent B6  
649 mice (SB28-15,000 cells/mouse, GL261-25,000 cells/mouse) and immune-deficient NSG (SB28-  
650 10,000 cells/mouse, GL261-20,000 cells/mouse) and RAG1<sup>-/-</sup> mice (SB28-15,000 cells/mouse,  
651 GL261-25,000 cells/mouse). Median survival days and number of animals are indicated in the  
652 graph legend. Data combined from two to three independent experiments. Statistical significance  
653 was determined by log-rank test, considering  $p$ -value  $<0.05$  to be significant. (B) Frequency of  
654 CD45<sup>hi</sup> immune cells and CD3<sup>+</sup> T cells from the tumor-bearing left hemisphere of SB28-injected  
655 mice or the left hemisphere of the sham-injected group on day 8 and 15. Data shown as mean $\pm$ SD  
656 from two independent experiments. N=10 for SB28-bearing mice and n=3-5 for sham-injected  
657 mice. One-way ANOVA with Tukey's multiple comparison test was performed to determine  
658 statistical significance (\* $p$  $<0.05$ , \*\* $p$  $<0.01$ , \*\*\* $p$  $<0.001$ ). (C) Frequency of OVA-specific CD8<sup>+</sup> T  
659 cells were measured using tetramer antibody from the tumor-bearing left hemisphere of SB28-  
660 OVA (25,000 cells/mouse)-injected B6 wild-type mice on day 14 post-tumor implantation. Data  
661 shown as mean $\pm$ SD from two independent experiments. N=9/group. \* $p$  $<0.05$  was determined by  
662 unpaired unpaired  $t$ -test. (D) Survival analysis was performed after adoptive transfer of OT-I cells  
663 into RAG1<sup>-/-</sup> mice bearing SB28-OVA tumors. Median survival days and number of animals are  
664 indicated in the graph legend. Data combined from two independent experiments. Log-rank test  
665 was performed and \*\* $p$  $<0.01$  was determined to be significant.

666

667 **Figure 2. More male CD8<sup>+</sup> T cells are functionally exhausted and skewed toward a**  
668 **progenitor exhausted T cell phenotype.** Tumor-infiltrating T cells were analyzed on day 15  
669 post-implantation of SB28 tumor cells. (A) Frequency of T cell subsets in CD45<sup>hi</sup> immune cells.  
670 Data combined from two independent experiments. n=11-12 for the SB28-injected group and n=4  
671 for the sham-injected group. (B) Inhibitory receptor expression in CD8<sup>+</sup> and CD4<sup>+</sup>Foxp3<sup>-</sup> effector  
672 T cells (Teff). Data combined from two independent experiments. n=10-12 for the SB28-injected  
673 group and n=4 for the sham-injected group. (C) Intracellular cytokine expression in CD8<sup>+</sup> and  
674 CD4<sup>+</sup>Foxp3<sup>-</sup> effector T cells was measured after ex vivo stimulation. Data combined from two  
675 independent experiments. n=7-10 for the SB28-injected group and n=3 for the sham-injected  
676 group. (D) Exhausted T cell subsets in CD8<sup>+</sup> T cells: TEX (terminally exhausted;  
677 CD8<sup>+</sup>CD44<sup>+</sup>PD1<sup>+</sup>TCF1<sup>+</sup>TIM3<sup>+</sup>), PEX (progenitor exhausted; CD8<sup>+</sup>CD44<sup>+</sup>PD1<sup>+</sup>TCF1<sup>+</sup>TIM3<sup>-</sup>), EFF  
678 (effector; CD8<sup>+</sup>CD44<sup>+</sup>TCF1<sup>+</sup>TIM3<sup>-</sup>). Data combined from two independent experiments. n=9-10

679 for the SB28-injected group and n=4 for the sham-injected group. Intracellular expression of (E)  
680 granzyme B and (F) IFN- $\gamma$ +TNF $^+$  in each CD8 $^+$  T cell subset after *ex vivo* stimulation. Data  
681 combined from two independent experiments. n=11-12 for SB28-injected group and n=4 for  
682 sham-injected group. Two-way ANOVA analysis with Tukey's multiple comparison test (A-C, E,F)  
683 or unpaired Student's *t* test (D) was performed (\* $p$ <0.05, \*\* $p$ <0.01, \*\*\* $p$ <0.001).

684

685 **Figure 3. Males are more responsive to anti-PD1 therapy.** (A) Schematics depicting treatment  
686 regimen for anti-PD1 and immune profiling. (B) Kaplan-Meier curves depicting survival of male  
687 and female mice treated with anti-PD1 or isotype antibodies (10 mg/kg) starting from day 7 post-  
688 intracranial tumor implantation. Combined results from three independent experiments with log-  
689 rank test (\*\* $p$ <0.01, \*\*\* $p$ <0.001). Median survival length and number of animals are indicated. (C-  
690 F) Immunophenotyping was performed on tumor-infiltrating immune cells on day 18 after the last  
691 treatment. Data combined from two independent experiments. n=9-10 for the anti-PD1-treatment  
692 group and n=7-8 for the isotype antibody-treated group. (C) Percentage of CD8 $^+$  T cells in CD45 $^{\text{hi}}$   
693 cells. (D) Proliferation marker Ki-67 expression in CD8 $^+$  T cells. Data shown as mean $\pm$ SD of  
694 n=5/group from one of two independently repeated experiments. (E) Frequency of exhausted T  
695 cell subsets in CD8 $^+$  T cells. (F) Percentages of intracellular CD8 $^+$  T cells expressing IFN- $\gamma$  $^+$ , TNF $^+$ ,  
696 and granzyme B. Two-way ANOVA analysis with Tukey's multiple comparison test was performed  
697 (\* $p$ <0.05, \*\* $p$ <0.01, \*\*\* $p$ <0.001).

698

699 **Figure 4. Immune cell-intrinsic and cell-extrinsic effect in GBM survival.** (A) A schematic  
700 figure of the generation of bone marrow chimera models. Immune profiling was performed from  
701 the tumor-bearing hemisphere on day 14 post-tumor implantation (SB28, 10,000 cells/injection).  
702 (B) Frequency of T cell subsets in CD45 $^{\text{hi}}$  cells. Data combined from three independent  
703 experiments. n=7-17 per group. One-way ANOVA analysis with Tukey's multiple comparison test  
704 (\* $p$ <0.05, \*\* $p$ <0.01, \*\*\* $p$ <0.001). (C) Percentage of PD1 and CTLA4 expression and (D)  
705 exhausted T cell subsets in CD8 $^+$  T cells. Data combined from three independent experiments.  
706 n=4-11 per group. One-way ANOVA analysis with Tukey's multiple comparison test (\* $p$ <0.05,  
707 \*\* $p$ <0.01). (E) Kaplan-Meier curves depicting survival of bone marrow chimeras after intracranial  
708 injection of SB28 cells. Data shown is combined from two independent experiments. n=18=20 per  
709 group. Statistical significance was determined by log-rank test (\* $p$ <0.05, \*\* $p$ <0.01).

710

711 **Figure 5. Cell-intrinsic regulation of sex differences in T cell function.** (A) Schematics  
712 depicting *in vitro* generation of exhausted T cells. (B) Exhaustion markers and cytokine expression  
713 were measured on day 5 by flow cytometry after polyclonal stimulation with stimulation cocktail  
714 for 4 hours. Data shown as mean±SD and is representative of three independent experiments.  
715 Two-way ANOVA analysis with Tukey's multiple comparison test (\* $p<0.05$ , \*\* $p<0.01$ ). (C) qPCR  
716 analysis on exhausted T cells. Relative expression levels normalized to male T cells are shown.  
717 (D) Kaplan-Meier curves depicting survival of male and female RAG1<sup>-/-</sup> mice bearing SB28-OVA  
718 tumor cells after adoptive transfer of OT-I cells. Data shown is combined from two independent  
719 experiments. Statistical significance was determined by log-rank test (\* $p<0.05$ , \*\* $p<0.01$ ).

720

721 **Figure 6. Sex differences in exhausted T cells in GBM patients** (A) A gating strategy for  
722 exhausted T cell subsets from GBM patient tumors. (B) Frequency of progenitor exhausted T cells  
723 (PEX; CD8<sup>+</sup>KLRG1-PD1<sup>+</sup>CXCR5-TCF1<sup>+</sup>TIM3<sup>-</sup>) and (C) TOX expression in CD8<sup>+</sup> T cells from  
724 tumors of male (n=18) and female (n=14) patients with IDH-wild type GBM tumors. Unpaired t-  
725 test (\* $p<0.05$ ). (D) *In vitro* induction of exhaustion in human CD8<sup>+</sup> T cells. (E) Exhaustion marker  
726 expression in CD8<sup>+</sup> T cells on day 12 post-stimulation. Two-way ANOVA analysis with Tukey's  
727 multiple comparison test (\* $p<0.05$ , \*\* $p<0.01$ , \*\*\* $p<0.001$ ). (F) Intracellular expression of IFN-  
728  $\gamma$ <sup>+</sup>TNF<sup>+</sup> in CD8<sup>+</sup> T cells during repeated stimulation. Multiple unpaired t-test was performed  
729 (\* $p<0.05$ , \*\* $p<0.01$ ). Data shown as mean±SD and is representative of two independent  
730 experiments. (G) Proposed model of sex-specific T cell phenotype and functionality in GBM  
731 patients.

732

733

734



735 **Figures**

**Figure.1**

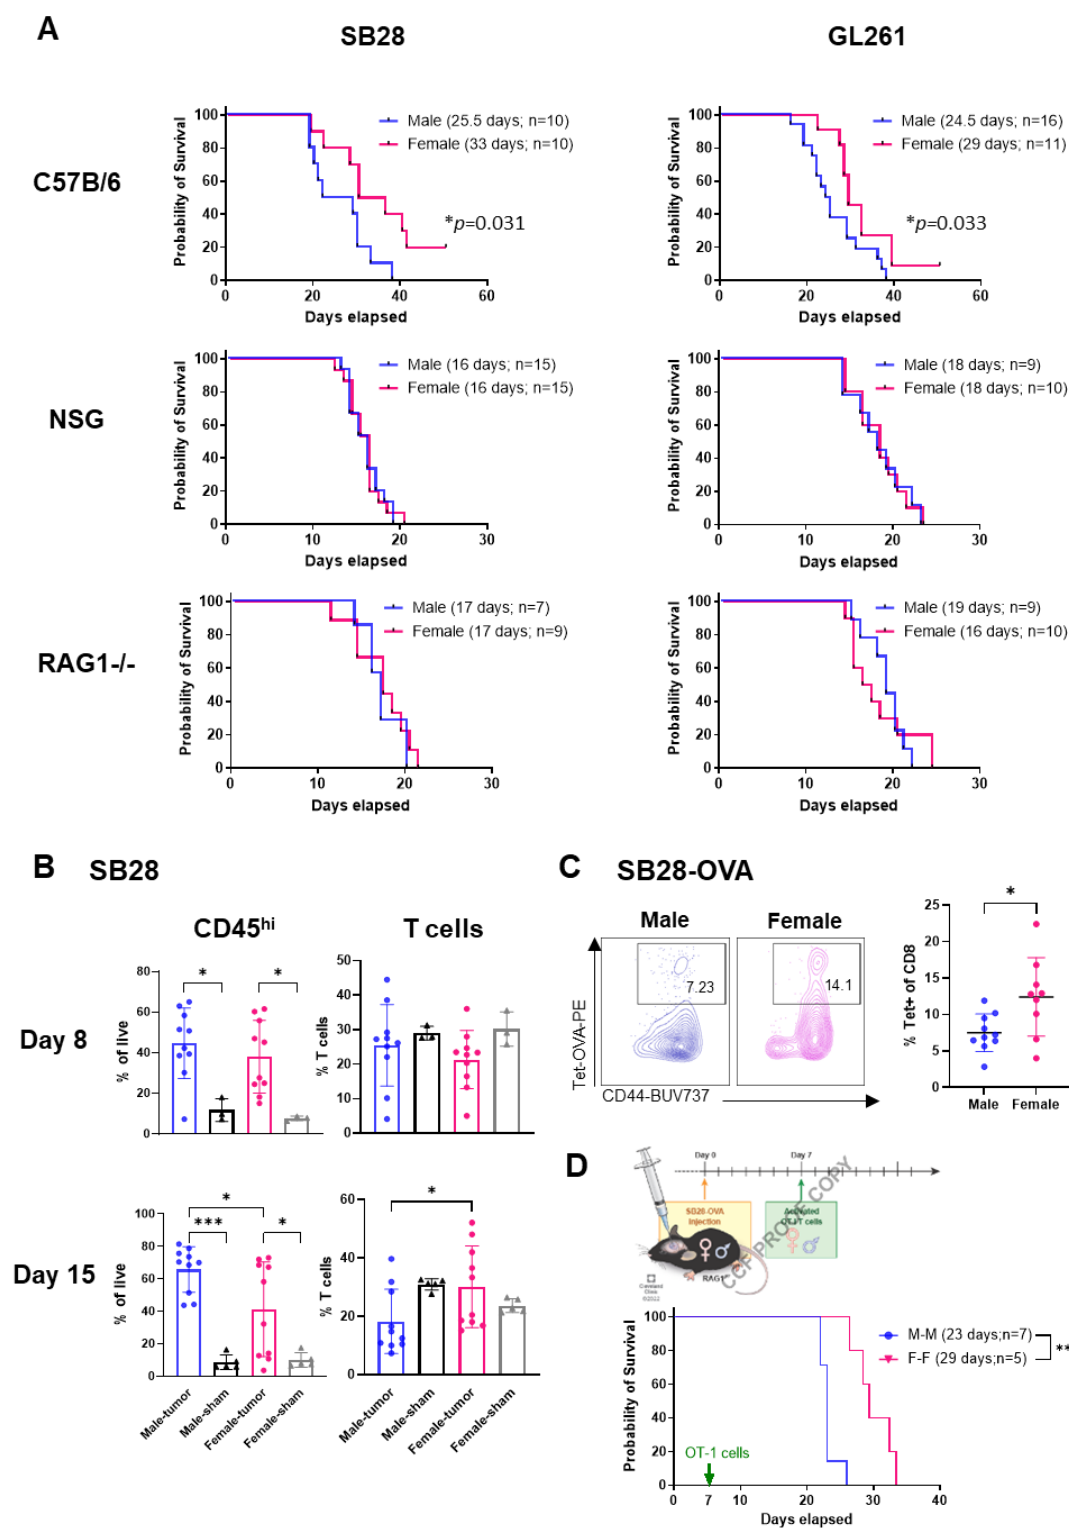

**Figure.2**

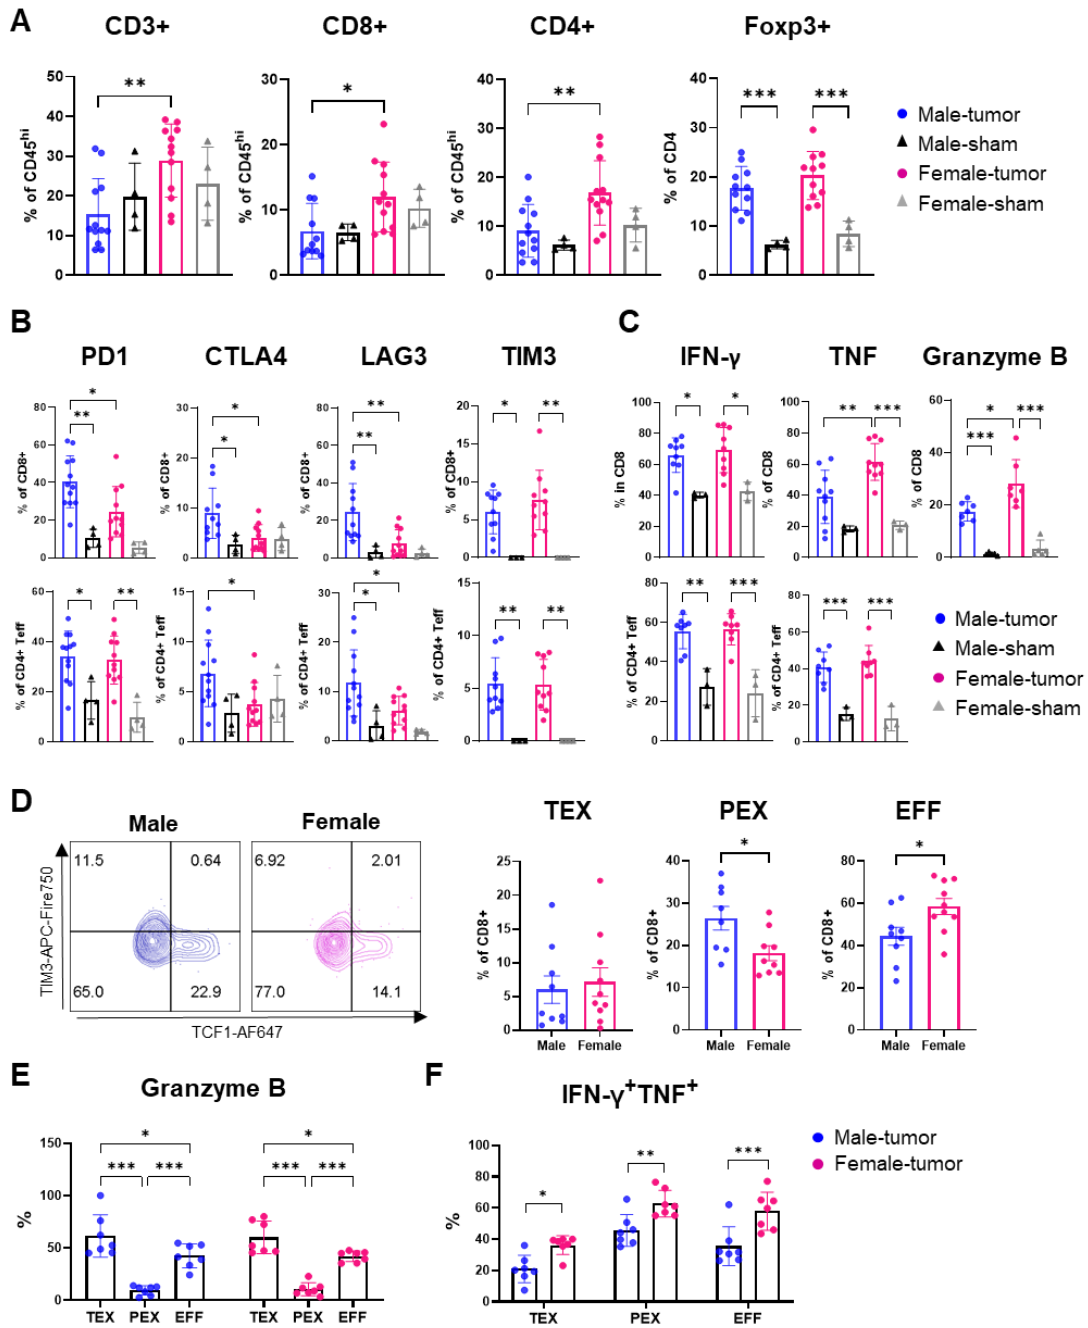

737

738

739

740

741

**Figure.3**

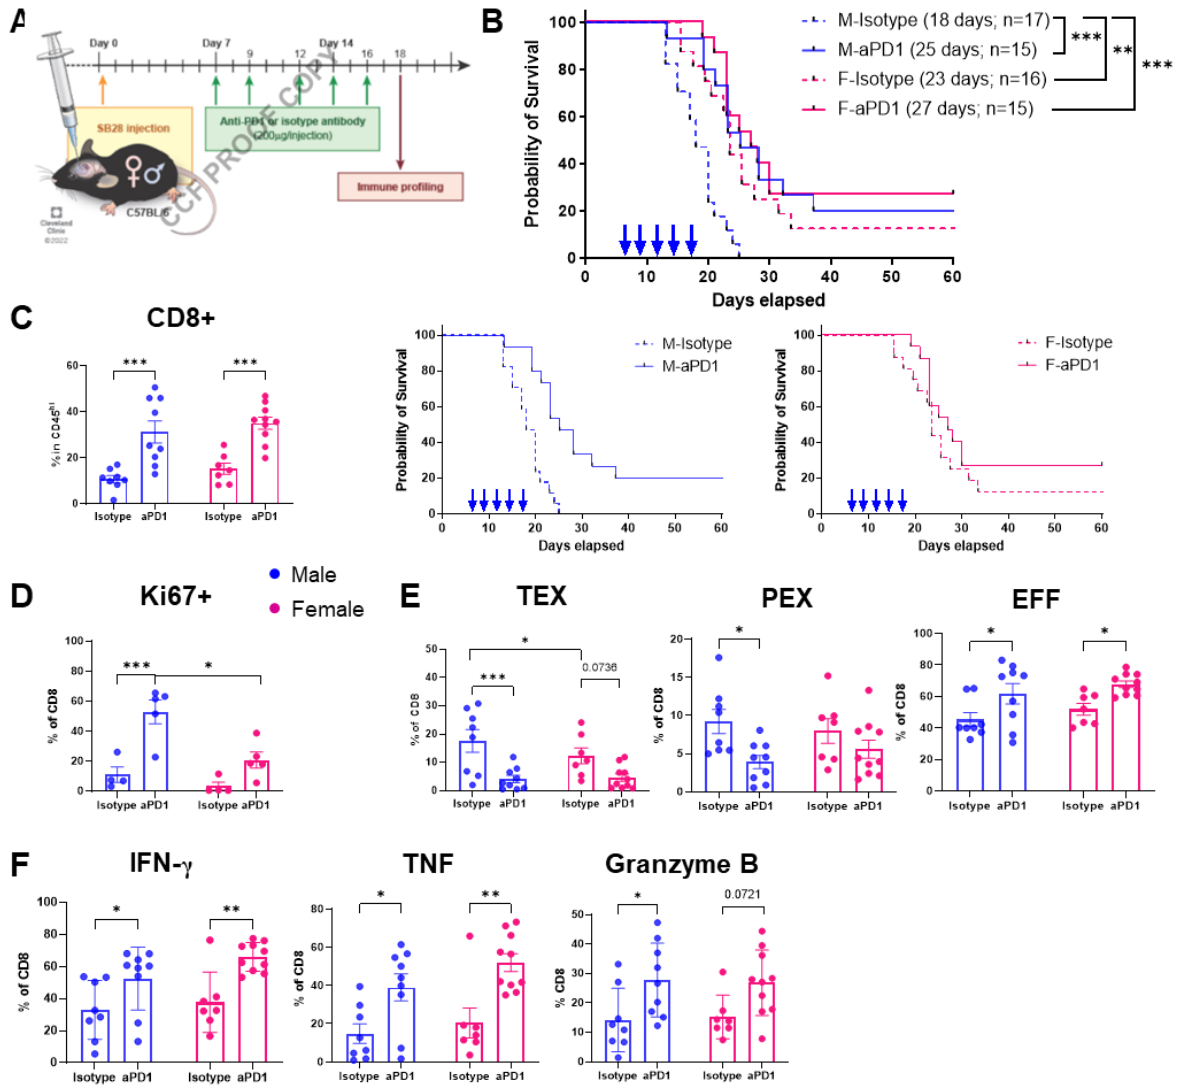

742

743

**Figure.4**

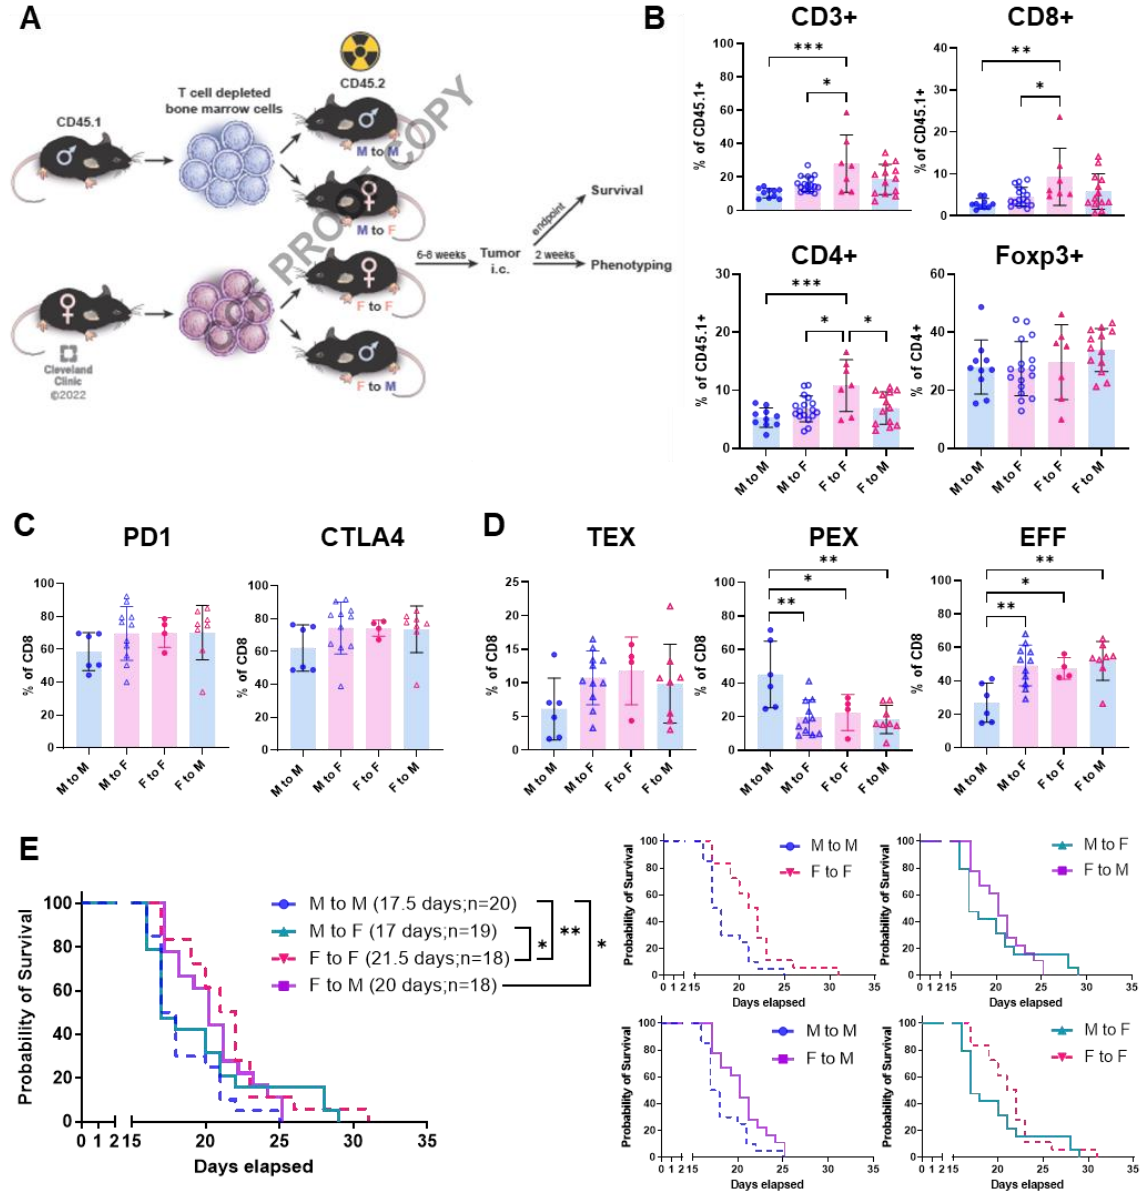

744

745

**Figure.5**

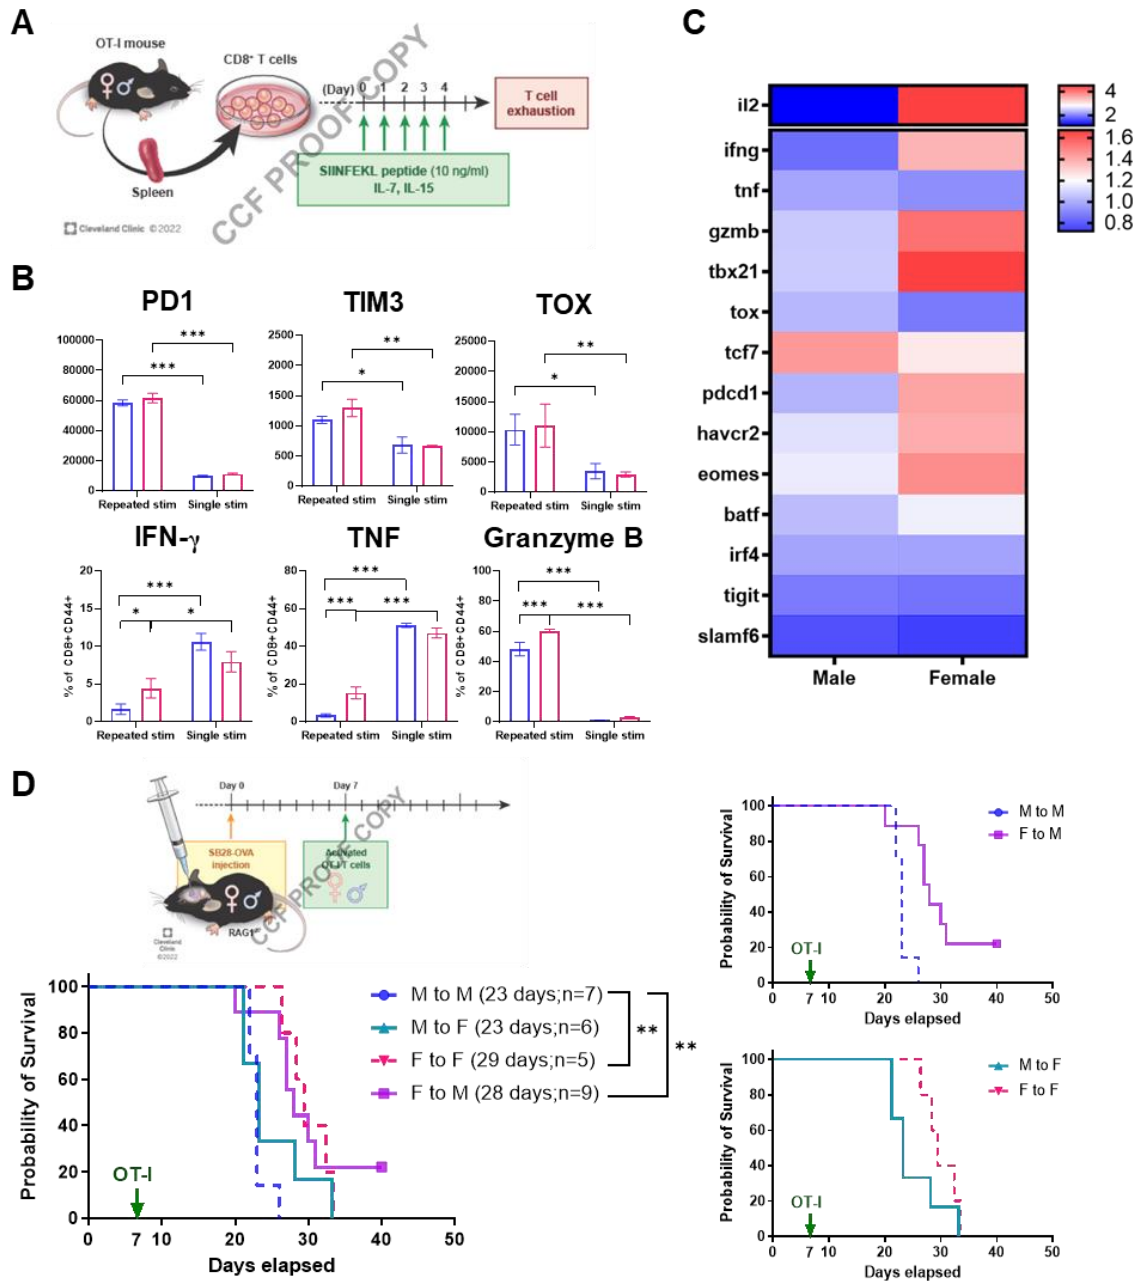

746

747

**Figure.6**

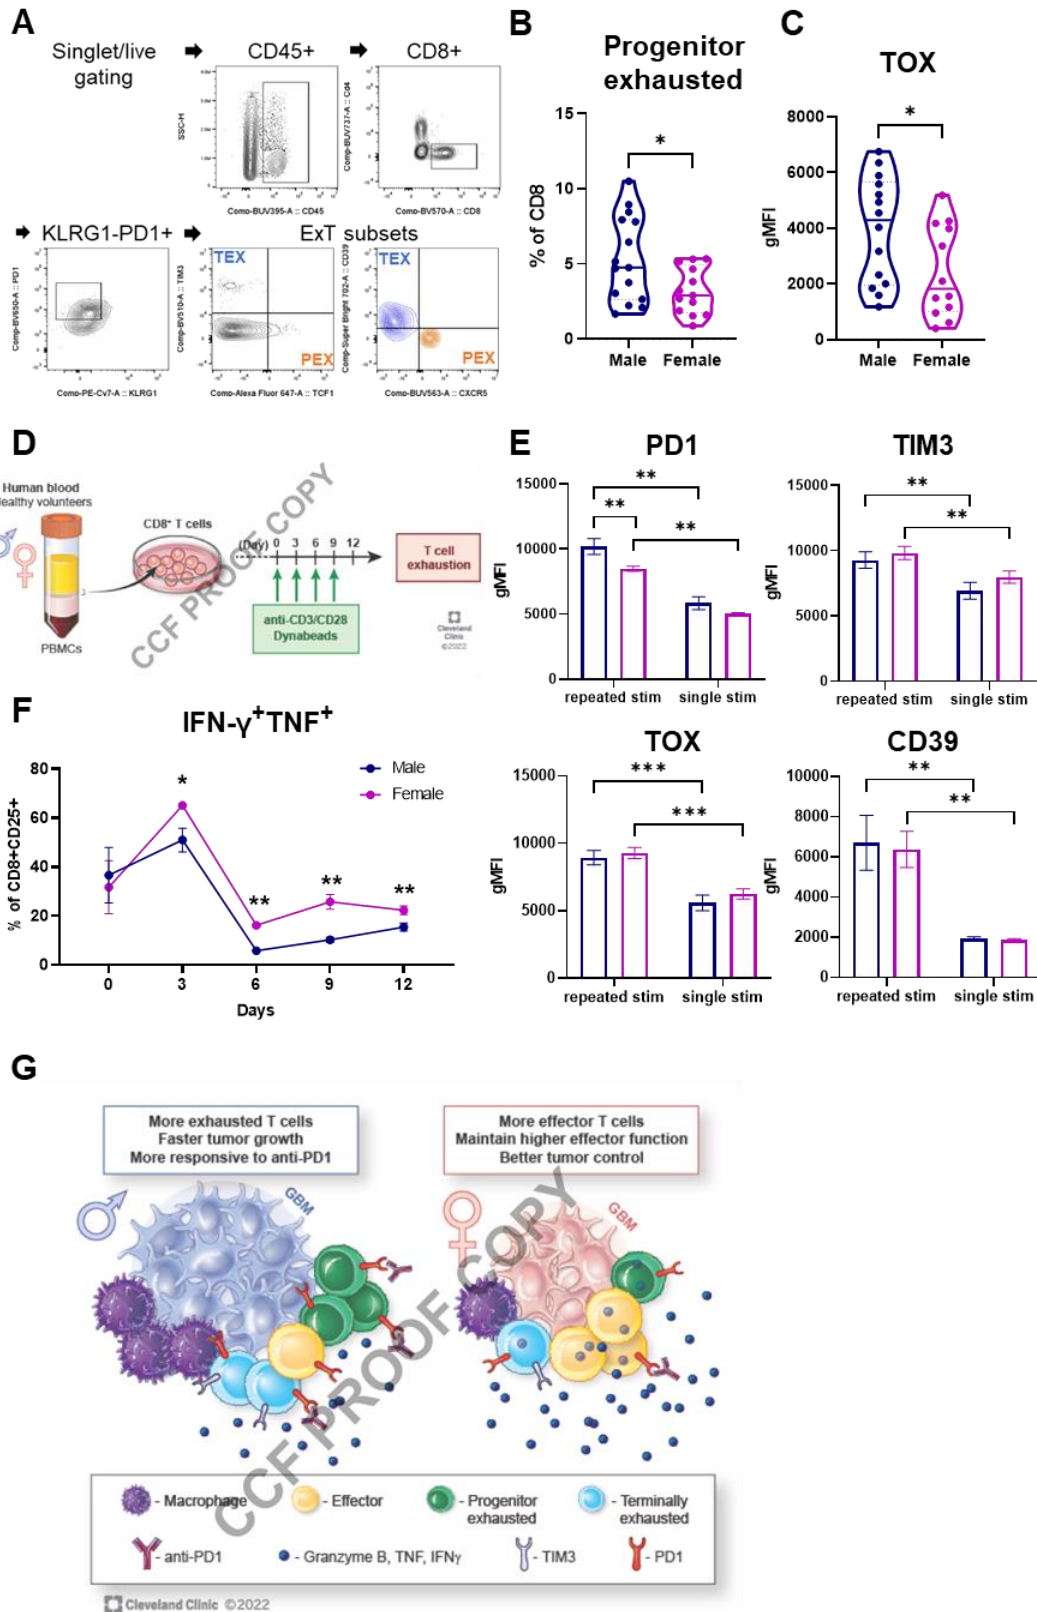

Source: http://biorxiv.org/content/10.1101/2022.08.17.503211v1.full.pdf
